# Supplementary material for: Enzymatic Shaving of the Tegument Surface of Live Schistosomes for Proteomic Analysis: A Rational Approach to Select Vaccine Candidates
Source: PubMed Central journal article supplement (PMC3066142; doi:10.1371/journal.pntd.0000993), 2011-03-29

**A – Peptide chromatogram of a representative Trypsin shaving experiment. See Materials and Methods for nanoHPLC separation conditions.**

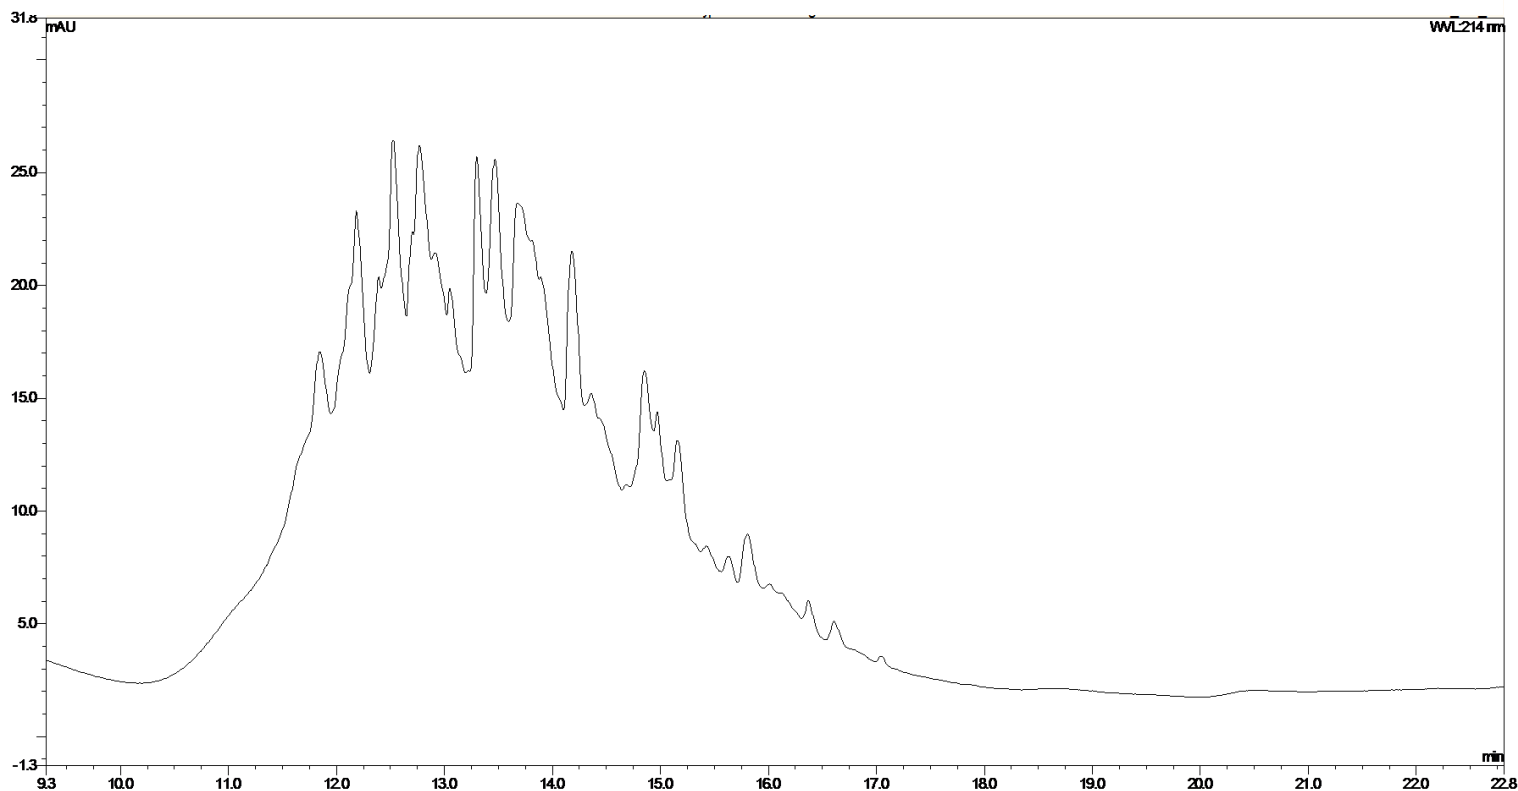

**B - Peptide chromatogram of a representative PiPLC shaving / iTRAQ experiment. See Materials and Methods for nanoHPLC separation conditions.**

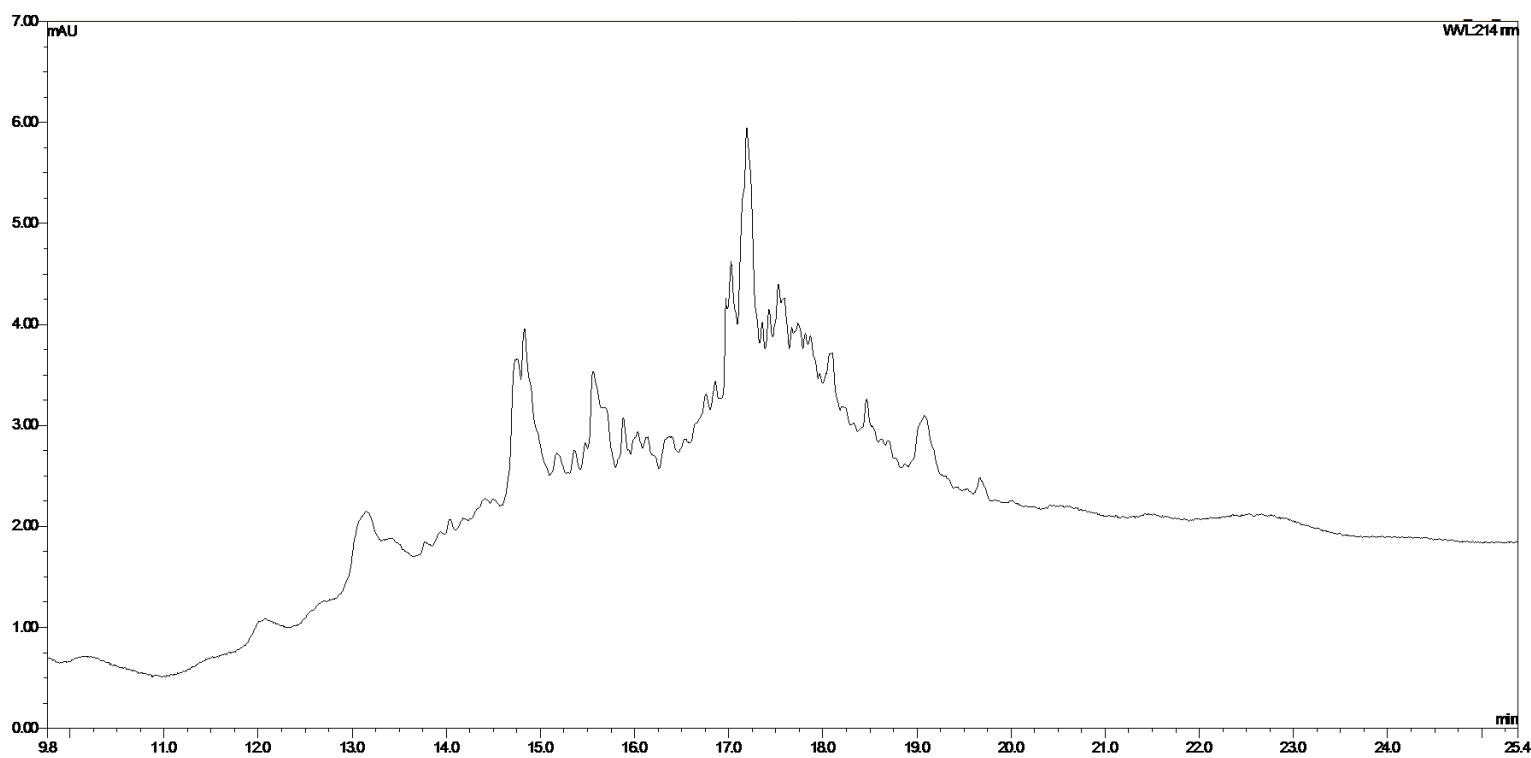

Supplement: pntd.0000993.s001.pdf [file pntd.0000993.s001.pdf]
