# Supplementary material for: Enzymatic Shaving of the Tegument Surface of Live Schistosomes for Proteomic Analysis: A Rational Approach to Select Vaccine Candidates
Source: PubMed Central journal article supplement (PMC3066142; doi:10.1371/journal.pntd.0000993), 2011-03-29

# iTRAQ labelling and protein identifications

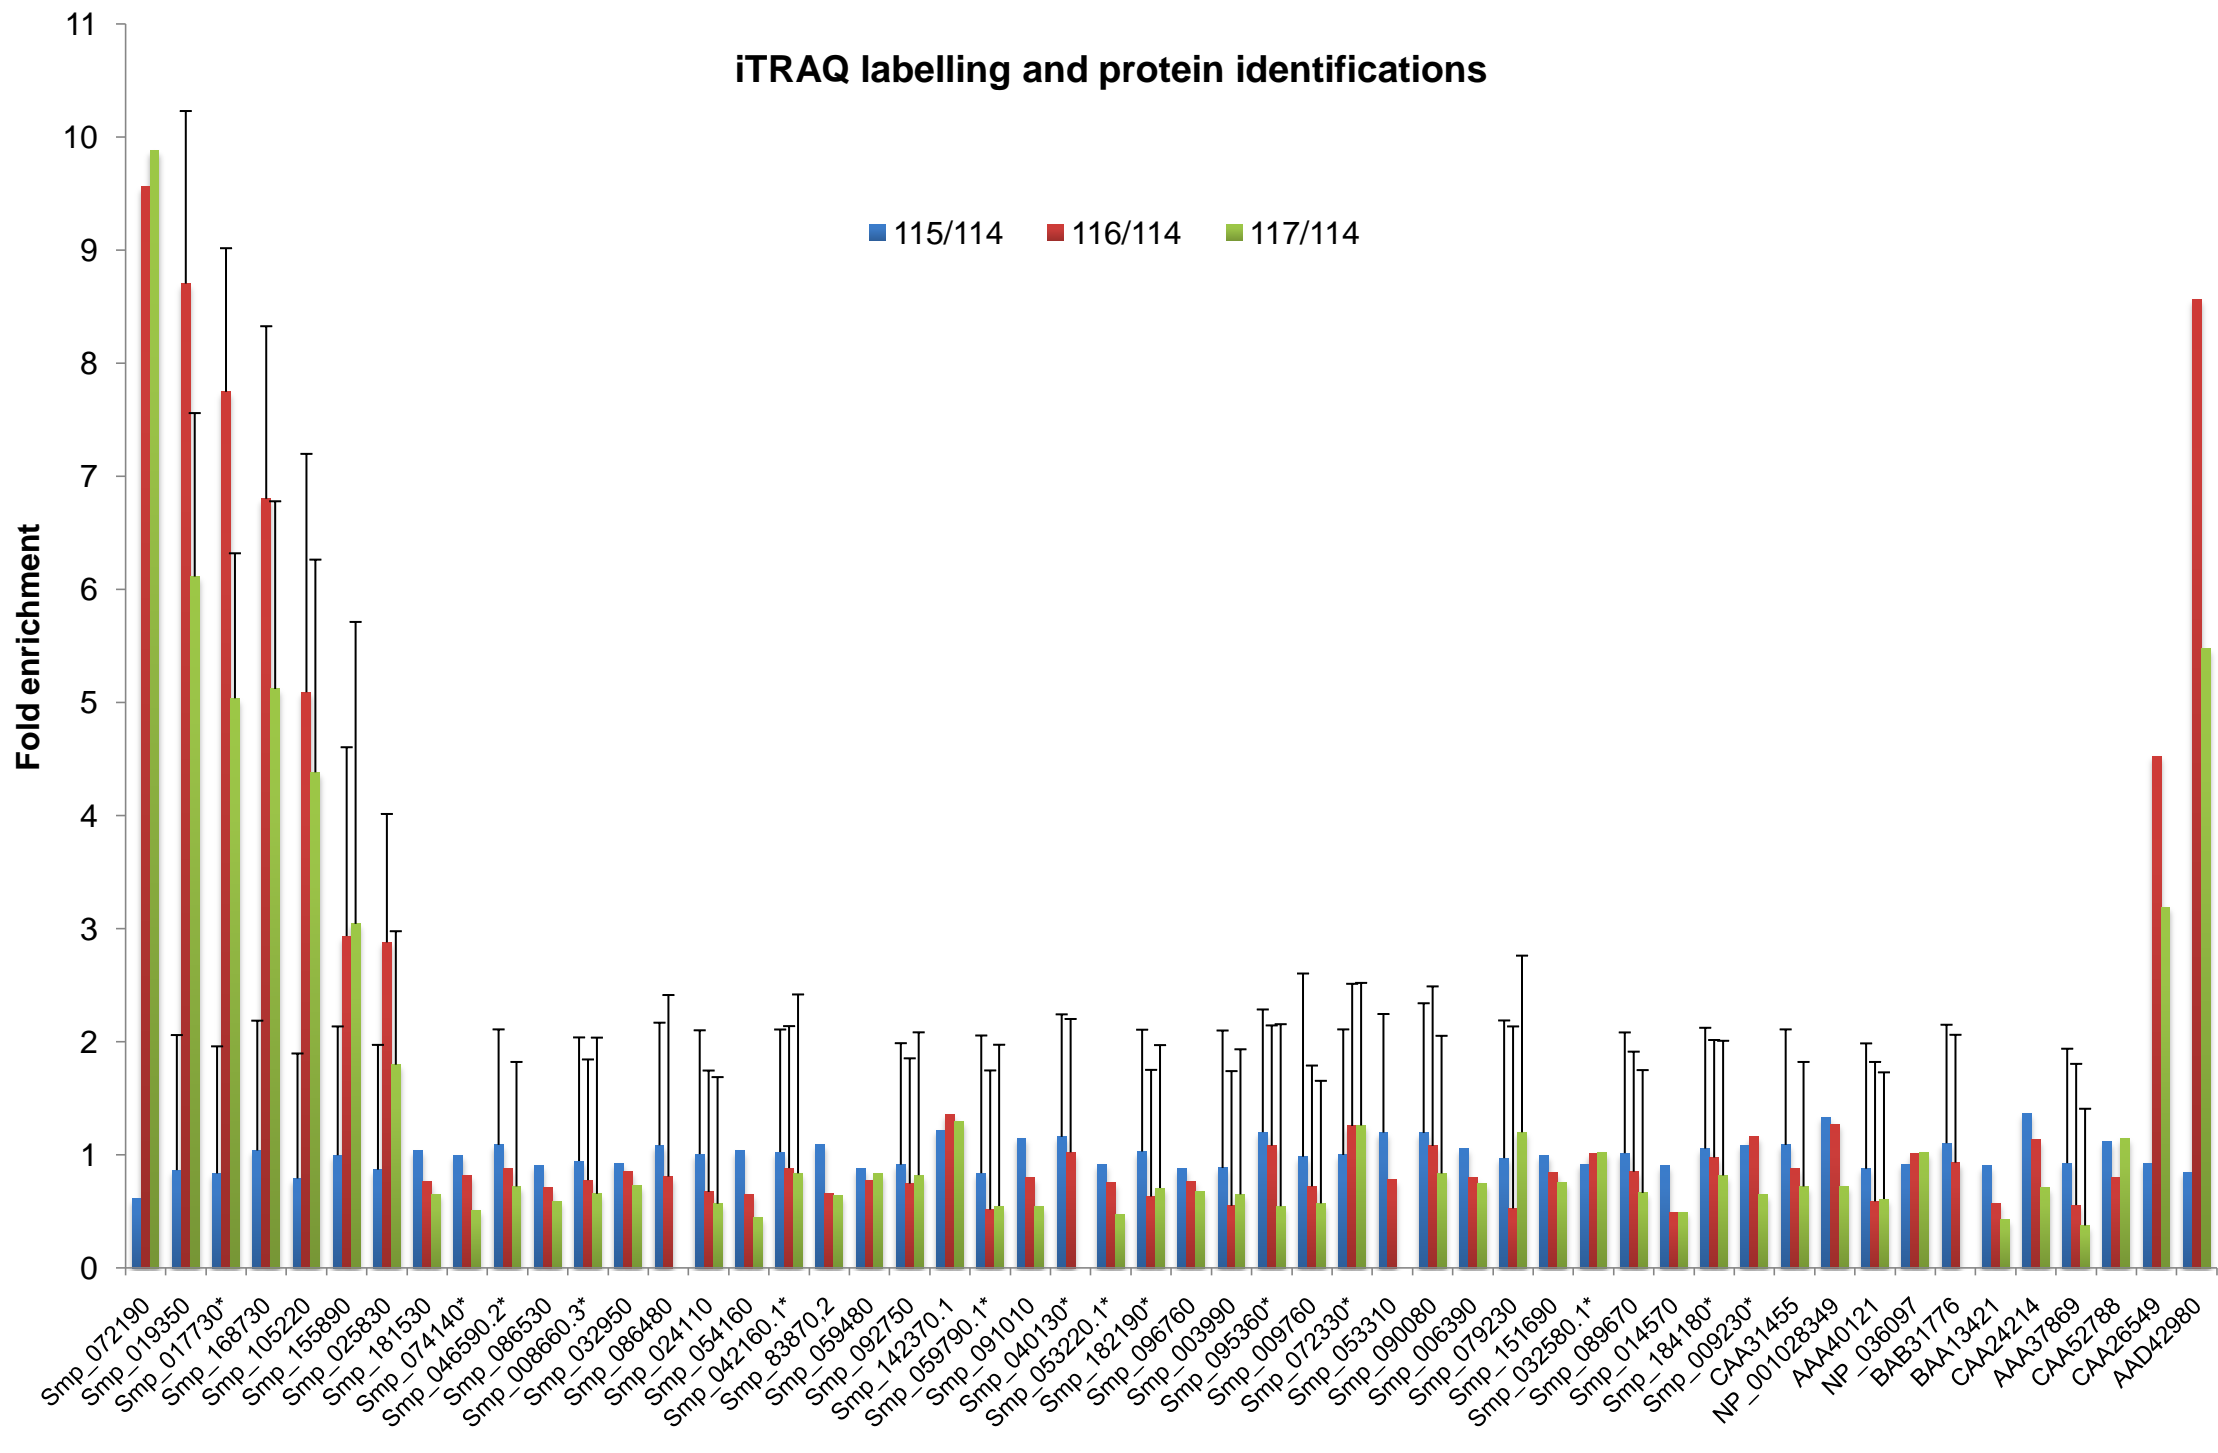

Supplement: pntd.0000993.s002.pdf [file pntd.0000993.s002.pdf]
