# Supplementary material for: Enzymatic Shaving of the Tegument Surface of Live Schistosomes for Proteomic Analysis: A Rational Approach to Select Vaccine Candidates
Source: PubMed Central journal article supplement (PMC3066142; doi:10.1371/journal.pntd.0000993), 2011-03-29
Supplement: pntd.0000993.s003.pdf [file pntd.0000993.s003.pdf]

**Peptide hits for Sm200 (Smp\_017730) - PiPLC ( ) versus Trypsin shaving ( ). Peptide common to both enzymatic treatments ( ) and predicted N-linked glycosylation sites**

MYFLQLFLFLFTSVCNTLSDLHSNNVVDIKAHDYKLLTKILAAARQLQDLFDNDKNTHGLFHAELNQKVYLIV  
DLGGLYQVSSVEITSDEPENLKQTISIGYGFDKNTTSLFGSLY**NCY**QQTSTLCIPACSQYDNSR. **TGFVGN**  
**SLLWSFQSDK**.EGWTRIIDLIIRGTPFDENRSMKNNLDDITLFKPYVDHLVPAESMESCNGLLWHLNDESS  
VTESSALAAATDDR**NVTI**YFGK. **TYSVTSVHFVTSK**.RDDMPQEYTLHFNGMESLTKIINLQNDCTLTASSDND  
GANFKEYNCPTTDLSEYTFDYVTNVKGLYKLVHVGYPFHYPKIQIIPSKEDDKTIMVDKNVLQISCIAQSC  
**NST**SNVLLDVDDSYRRSRSSDKSCPMNGHIVRCEYLNLFRLSTSPNDDNNQK. **QLTNQGIINTEFSEIMTE**  
**LR**. **IQSNAEK**.LIVTMPRTHQYYSQYECSCQATDNKKSQFLSSTNLKPTDFDQDFIFQT**NYTT**IFADQTIES  
HVGFIELPENEHESYFKLNIIGYSLLDVQIGVVFVEGGQAGSRTNANIEEISVQAFPGINVGSDLWSIPVYK  
YELQDVWPDSDVDSVITVWSPMKALSATKSPSVIDIFR. **ALIITSSGVNTIR**.AWVWQRDShLLDIR. **AYHQ**  
**LDENNVDSQLK**.ILTLQRSGCSPSESEDEVVASVQLK. **DGQCSTDNNDIITCTR**.TIHQIIFK. **LNNPSTSDV**  
**YK**.LYMKSDGVEDNVESTSSIDLVTSGSLGETVKEDIKAGLSLTVEGIHNNHETQETELDVAVHIASKVISD  
NIACRPTYLLLEFIEPNIELKSRVSSKQTMFRIKLPNSQKEINLKMQLSIGSVDPQTQSEATTNQSIQAFQNPFI  
IPTDIKVDENQLIQWFGLPITFNNLLHHYETKLSGLPKACEQASEFNLPIQEQEID**NGTI**YRVNLK. **NIPDPTI**  
**TK**.NGLAIDYNFKVTPVFKGIDGKSITMGTSDDIRFSTGR. **TGQTDLKAPTSGR**.YYSLQVQVRPSQIPSCNLN  
ETLNTQFILR. **VIGEVDEYPDYIK**.QVNYVPITMK. **TTETLNDKNNHVK**.LYKIENLLPGRRYELQEVHVQTEEV  
FISPERVVINCTGSGVGNPNTSQKSLEWKLFDDGGRLPDGSRSLKTQEAQSGPLWYAMESLIFDPVVKQHG  
GVYACFIRPSILELMNKPTLHKVTVTVSDLEVDINSK. **IVFEGEK**.IIITCRTASPGQLDWMLPSGEKVEIMNE  
MKSDDDNDQPYTIKDENDDVKLSIKLIIPK. **VNLNKVGK**.YTCLHSPSNKQTFSLKMKEVIKLVKSPSSD  
KPGKTLILDCTANLGNLHQSVVWYK. **RPNSNSPWLEITEAIQITIEHITIQK**. **NPEDTLSSGVWVLSLK**.VK. **NS**  
**PGIIGEFMCTIQNIQTMMNIE**.METGSIMTNDNDFSKITHATIKVSLKSVLKILTPIKLENGQISVHCQGYPAH  
SKDR. **LQWVYIPLNTDNK**.SDKVITIVHSNPKDEENDQESDGNKSLDEKEIDEIVSLAFQLTDSIPATWPGS  
TGPQQLVQSLIEQEHQPKQMYTAERLSLIFDSKYAEK. **VADGILSCR**.YVRPKGILPMDSEAAESLSKVTI  
PETNDDSEILEKSEIPMKTLLDAK. **QGDDNDNLSILK**.SSLNEEPDEVQSDDKKNTEKKSISLLLYMNLMA  
LMIIFMRN
